# Supplementary material for: A single-residue change in the HIV-1 V3 loop associated with maraviroc resistance impairs CCR5 binding affinity while increasing replicative capacity
Source: PubMed Central journal article supplement (PMC4470041; doi:10.1186/s12977-015-0177-1), 2015-06-18

**Additional file 6**

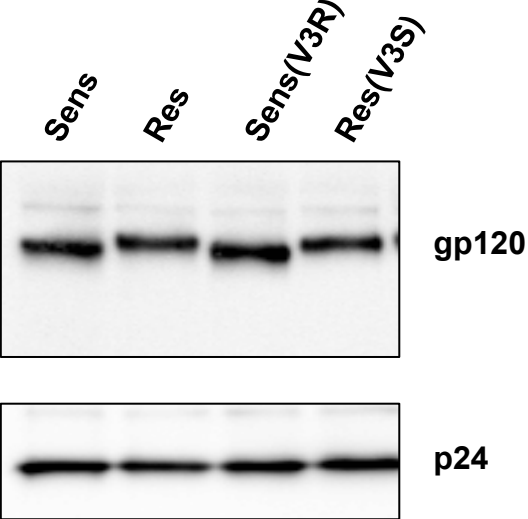

Supplement: 12977_2015_177_MOESM6_ESM.pdf [file 12977_2015_177_MOESM6_ESM.pdf]
