# Supplementary material for: A single-residue change in the HIV-1 V3 loop associated with maraviroc resistance impairs CCR5 binding affinity while increasing replicative capacity
Source: PubMed Central journal article supplement (PMC4470041; doi:10.1186/s12977-015-0177-1), 2015-06-18
Supplement: 12977_2015_177_MOESM7_ESM.pdf [file 12977_2015_177_MOESM7_ESM.pdf]

## Additional file 7

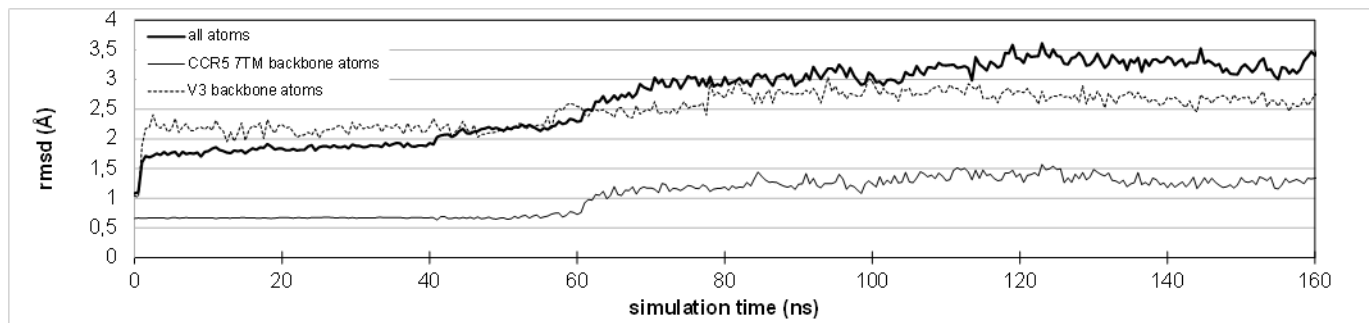

| Time (ns)                                                                                                                                                                                    | 1-20 | 20-40 | 40-60 | 60-80 | 80-100 | 100-160 |
|----------------------------------------------------------------------------------------------------------------------------------------------------------------------------------------------|------|-------|-------|-------|--------|---------|
| <b>Constraints (10 kcal/mol.Å<sup>2</sup>)</b>                                                                                                                                               |      |       |       |       |        |         |
| CCR5: ECL2 & N-terminus                                                                                                                                                                      |      |       |       |       |        |         |
| CCR5: ICL1-3, ECL1, ECL3, C-terminus                                                                                                                                                         | all  | bb    |       |       |        |         |
| CCR5: 7TM                                                                                                                                                                                    | all  | all   | bb    |       |        |         |
| V3 tip: residues P308-R313                                                                                                                                                                   | all  |       |       |       |        |         |
| V3 bridging sheet: C296 & C330                                                                                                                                                               | bb   | bb    | bb    | bb    | bb     | bb      |
| <b>Restraints (distances and angles)</b>                                                                                                                                                     |      |       |       |       |        |         |
| <b>CCR5 N-terminus – V3 base:</b><br>Y10(OSO <sub>3</sub> <sup>-</sup> ) – R326(guanidinium),<br>Y14(OSO <sub>3</sub> <sup>-</sup> ) – R298(guanidinium), N302(CONH <sub>2</sub> ), T303(OH) | sc   | sc    | sc    | sc    | sc     | sc      |
| <b>Intra V3 base:</b><br>T297(NH) – H329(CO), T297(CO) – H329(NH)                                                                                                                            | bb   | bb    | bb    | bb    | bb     | bb      |
| <b>CCR5 TM7 – V3 tip:</b><br>E283 (COO <sup>-</sup> ) – R313(guanidinium)                                                                                                                    | sc   | sc    | sc    | sc    | sc     |         |
| <b>CCR5 ECL2 – V3 tip:</b><br>S180(CO) – A314(NH)<br>F182(CO) – Y316 (NH)<br>F182(NH) – A314(CO)                                                                                             | bb   | bb    | bb    | bb    | bb     |         |
| <b>Intra V3 tip:</b><br>P308(CO) – F315(NH)                                                                                                                                                  | bb   | bb    | bb    | bb    |        |         |
