# Supplementary material for: A single-residue change in the HIV-1 V3 loop associated with maraviroc resistance impairs CCR5 binding affinity while increasing replicative capacity
Source: PubMed Central journal article supplement (PMC4470041; doi:10.1186/s12977-015-0177-1), 2015-06-18
Supplement: 12977_2015_177_MOESM8_ESM.pdf [file 12977_2015_177_MOESM8_ESM.pdf]

## Additional file 8

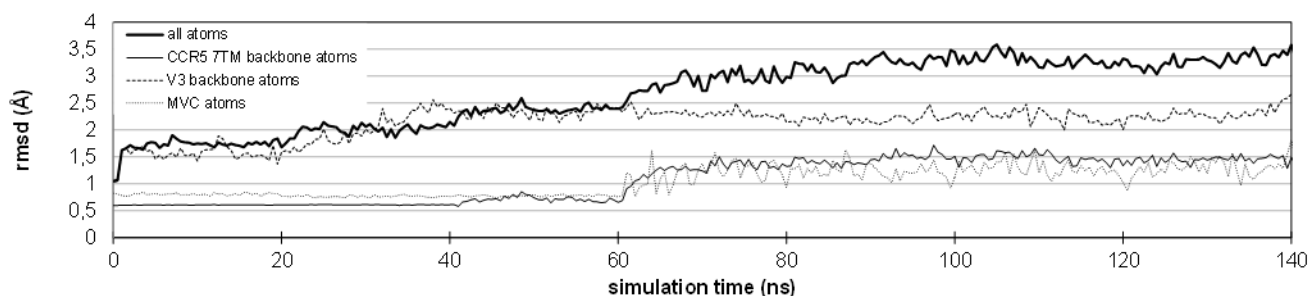

| Time (ns)                                                                                                                                                                                    | 1-20 | 20-40 | 40-60 | 60-80 | 80-140 |
|----------------------------------------------------------------------------------------------------------------------------------------------------------------------------------------------|------|-------|-------|-------|--------|
| <b>Constraints (10 kcal/mol.Å<sup>2</sup>)</b>                                                                                                                                               |      |       |       |       |        |
| <b>CCR5: ICL1-3, ECL1, ECL3, C-terminus</b>                                                                                                                                                  | all  | bb    |       |       |        |
| <b>CCR5: 7TM</b>                                                                                                                                                                             | all  | all   | bb    |       |        |
| <b>V3 tip: residues S308-R313</b>                                                                                                                                                            |      |       |       |       |        |
| <b>V3 bridging sheet: C296 &amp; C330</b>                                                                                                                                                    | bb   | bb    | bb    | bb    | bb     |
| <b>MVC</b>                                                                                                                                                                                   | all  | all   | all   |       |        |
| <b>Restraints (distances and angles)</b>                                                                                                                                                     |      |       |       |       |        |
| <b>CCR5 N-terminus – V3 base:</b><br>Y10(OSO <sub>3</sub> <sup>-</sup> ) – R326(guanidinium),<br>Y14(OSO <sub>3</sub> <sup>-</sup> ) – R298(guanidinium), N302(CONH <sub>2</sub> ), T303(OH) | sc   | sc    | sc    | sc    | sc     |
| <b>Intra V3 base:</b><br>T297(NH) – H329(CO), T297(CO) – H329(NH)                                                                                                                            | bb   | bb    | bb    | bb    | bb     |
| <b>CCR5 TM7 – V3 tip:</b><br>E283 (COO <sup>-</sup> ) – R313(guanidinium)                                                                                                                    |      |       |       |       |        |
| <b>CCR5 ECL2 – V3 tip:</b><br>S180(CO) – A314(NH)<br>F182(CO) – Y316 (NH)<br>F182(NH) – A314(CO)                                                                                             | bb   | bb    | bb    | bb    |        |
| <b>Intra V3 tip:</b><br>S308(NH) – F315(CO)<br>S308(CO) – F315(NH)                                                                                                                           | bb   | bb    | bb    |       |        |
